# Supplementary material
Source: PubMed Central journal article supplement (PMC2872039)
Supplement: NIHMS193291-supplement-4.pdf [file NIHMS193291-supplement-4.pdf]

|      |   |            |            | $\Delta 1$  | $\Delta 2$ |             |            |
|------|---|------------|------------|-------------|------------|-------------|------------|
| Dmel | 1 | GATC~TAT   | TGCC~      | GATCGG      | TTAAATCAAA | AGTAC~      |            |
| Dsim | 1 | GATC~TAT   | TGCC~      | GATCGG      | TTAAATCAAA | AGTCC~      |            |
| Dsec | 1 | GATC~TAT   | TGCC~      | GATCGG      | TTAAATCAAA | AGTCC~      |            |
| Dyak | 1 | GATC~      | TGCC~      | GATCGG      | TTAAATCAAA | AGTCC~      |            |
| Dere | 1 | GATC~TTT   | TGCC~      | GATCGA      | TTGAATCAA  | AGTCT~      |            |
| Dana | 1 | GATTTTCAAT | TTCC~AAA   | ATAAATCGG   | TTAAATCAAA | GGCTT~CAC   | AC~        |
| Dper | 1 | GATCATCAAT | TGTTGCCTAT | TGGAAATCGG  | TTAAATCAAA | GGCTGAAGGA  | AA~        |
| Dpse | 1 | GATCATCAAT | TGTTCCCTCT | TGAAATCGG   | TTAAATCAAA | GGCTGAAGGA  | AA~        |
| Dwil | 1 | GATC~      |            | GAAATCGG    | TTAAATCAAA | AGGTAATTCA  | GAAC~      |
| Dvir | 1 | GATC~AAT   | TGCT~GGC~  | CAGGGCTCGG  | TGCCATCAAA | GCCCTT~AACC | AGGC GG~   |
| Dgri | 1 | GCTC~AAT   | TG~T~GGCA  | TAGAGATCGG  | TGCCATCAAA | GCCTTTAACC  | AGGCAGCCAG |
| Dmoj | 1 | GATC~AAT   | TATTTGAAGG | CTGTCAATCGG | TGCCATCAAA | GCCCTT~AGCC | ATG~       |

|      |    | $\Delta 3$ | $\Delta 4$ | $\Delta 5$ |            |            |            |
|------|----|------------|------------|------------|------------|------------|------------|
| Dmel | 33 | CGAATGCA   | GCGCG~     | TGCCTGA    | CTGACTGACT | TCCGCCA~   | TGT        |
| Dsim | 33 | CGAATGCA   | GCGCG~     | TGCCTGA    | CTGACTGACT | TCCGCCA~   | TGT        |
| Dsec | 33 | CGAATGCA   | GCGCG~     | TGCCTGA    | CTGACTGACT | TCCGCCA~   | TGT        |
| Dyak | 32 | CGAATGCA   | GCGCG~     | TGCCTGA    | CTGACTGACT | TCCGCCATGC | ATGGCCATGT |
| Dere | 33 | CGAATGCA   | GCGCG~     | TGCCTGA    | CTGACTGACT | TCCGCCA~   | TGT        |
| Dana | 47 | GCA        | GCGCG~     | TGCCTGA    | CTGACAGACT | TCCGGCA~   | TGT        |
| Dper | 53 | TCA        | GCGCGTGCTT | GACGGACTGA | CTGGCTGACT | TCCGCTT~   | CGT        |
| Dpse | 53 | TCA        | GCGCGTGCTT | GACGGACTGA | CTGGCTGACT | TCCGCTT~   | CGT        |
| Dwil | 37 | GAG        | GCGCGTGC~  | TG~CTG~    | CTGCCTGACT | TCCGCTG~   | CAACGG     |
| Dvir | 50 | CAAACG     | GCGCGTG~   |            | CTGCCTGACT | TCCGCC~    | CA~        |
| Dgri | 55 | CCAGCAATCG | GCGCGTG~   |            | CTGCCTGACT | TCCGCTC~   | GCTTCC     |
| Dmoj | 50 |            | GCGCGTG~   |            | CTGCCTGACT | TCCGCTC~   | CA~        |

|      |    |            | $\Delta 6$ | L156       |            |            |            |
|------|----|------------|------------|------------|------------|------------|------------|
| Dmel | 73 | CTATC~     | GTT        | TGACCCAAAA | CATTTGATG  | CGGGA~     |            |
| Dsim | 73 | CTATC~     | GTT        | TGACCCAAAA | CATTTCCATG | CGGGA~     |            |
| Dsec | 73 | CTATC~     | GTT        | TGACCCAAAA | CATTT~ATG  | CGGGA~     |            |
| Dyak | 82 | CGAGT~     | GTT        | TGACCCAAAA | CATTTGATG  | CGGGA~     |            |
| Dere | 73 | CGAGT~     | ATT        | TGACCCAAAA | CATTTGATG  | CGGGA~     |            |
| Dana | 82 | CGAGT~     | TCC        | TGACCCAAAA | CATTTGATG  | CGGGA~     |            |
| Dper | 96 | TGAGT~     | GTC        | TGACCCAAAA | CTGTGTT~GA | GTTACATGGG | GGCCCCACTC |
| Dpse | 96 | TGAGT~     | GTC        | TGACCCAAAA | CTGTGTT~GT | GTTACATGGG | GGCCCCACTC |
| Dwil | 76 | TGAGTTGTTT | GGAGTGTGAT | CCACCCGAAA | TTTTCCAT~  |            |            |
| Dvir | 82 | TGACT~     |            | GACCCAAAA  | CAGCTG~    | CCGCGACAAT | GTTGGTGGGG |
| Dgri | 95 | TGAGT~     |            | GACACAAAAG | GCAGACAAC~ | TGGCGACAAT | GTCTGCCAC  |
| Dmoj | 76 | TGTCT~     |            | GACCCAAAA  | GCGAGAAGAA | CGGCGACAAT | GAGACCTCAA |

|      |     | K152 <--   |            | $\Delta 7$  |             |             |             |
|------|-----|------------|------------|-------------|-------------|-------------|-------------|
| Dmel | 106 | TAGAACATTC | TGT~       | TACCTT      | TTTTCCCTAGT | TAATATTCAA  | GCCATCTTTT  |
| Dsim | 106 | TAGAACATTC | TGT~       | TAC~TT      | TTTTCCCTAGT | TAATATTCAA  | GCTGTCTTCC  |
| Dsec | 105 | TAGAACATTC | TGT~       | TACCTT      | TTACCTTAGT  | TAATATTCAA  | GCTGTCTTCC  |
| Dyak | 115 | TAGAACATTC | TGT~       | TACCTT      | TTACCTTAGT  | TAATATTCAA  | GCCGTCTTCC  |
| Dere | 106 | TAGAACATTC | TGT~       | TACCTT      | TTCCCTTAGT  | TAATATTCAA  | GCCGTCTTCC  |
| Dana | 115 | TGGAACATTC | AGACTCAG~  | GGGAAA      | GGTCCCTAGT  | TAATATTCAAT | TCTGTCTACC  |
| Dper | 143 | TAGAACATTC | CCTCTTGACT | ACCTTTCCCTT | TTTTGGCTAGT | TAATATTCAAT | GTTGTCT~AC  |
| Dpse | 143 | TAGAACATTC | CCTCTTGACT | ACCTTTCCCTT | TTTTGGCTAGT | TAATATTCAAT | GTTGTCT~AC  |
| Dwil | 114 |            |            | TT          | TCTGGCTAGT  | TAATATTCAAT | GTTGTCT~ATC |
| Dvir | 122 | AGTGGACTCA | ATCTTAGCCC | AGC~CGCACT  | TACGTCTAGT  | TAATATTGAC  | GCTGTCT~    |

Dgri 138 **T**CCT**A**GCCAG **A**T**C** ~~~~~ ~~~~~ C**A**C**A****T** **T**ACT**C**C**T**A**G****T** **T**A**A****T**A**T****G**C**A**C **A**G**T****G****T****T****G**A**C****T**  
Dmoj 120 **G**CC**C****G** ~~~~~ ~~~~~ ~~~~~ ~~~~~ ~~~~~ **C****T****C**C**T**A**G****T** **T**A**A****T**A**T****G**C**A**C **G****T****T****G****T****C****T**A**C****T**

Dmel 155 G  
Dsim 154 G  
Dsec 154 G  
Dyak 164 G  
Dere 155 G  
Dana 169 **A**  
Dper 202 **T**  
Dpse 202 **T**  
Dwil 145 **T**  
Dvir 176 ~  
Dgri 187 **C**  
Dmoj 153 G
