# Supplementary material
Source: PubMed Central journal article supplement (PMC2872039)
Supplement: NIHMS193291-supplement-6.pdf [file NIHMS193291-supplement-6.pdf]

Dmel 1 TAAACTG TTC CCAATTCG~G CA~GGGCTGG CAA~  
 Dsim 1 TAAACTG TTC CCAATTCG~G CA~GGGCTGG CAA~  
 Dsec 1 TAAACTG TTC CCAATTCG~G GA~GGGCTGG CAA~  
 Dere 1 TAAACTG TTC CCAATTC A~G CA~GTGCTGG CAA~  
 Dyak 1 TAAACTG TTC CCAATTCG~G CA~TGGCTGG CAA~  
 Dana 1 ACTTTTATTT CCAATTGG~A TG~GCTTTGG CAA~  
 Dper 1 GACACTG TTC CCGATTTCG~G CT~ACGCCGG CAA~  
 Dpse 1 GACACTG TTC CCGATTTCG~G CT~ATGCTGG CAA~  
 Dwil 1 TTTTAGTATG CAGTTTATT TCAAGCTAC~ CAACTAAT CTTCTCACTT GGCGTGTTC  
 Dmoj 1 CCACAT~TCA ATAAACC CAT TATCTGCAGC CAA~  
 Dvir 1 TCCCCT~TTT TTAAGGCA~C CATTGTAGC CAA~  
 Dgri 1 ATTCAA~TCA CATTTCAT~CC ATCCTGTAGC CAA~

Dmel 32 ~~~TAAATAT AATAATTTGT ATTCAATT~G TTGGACTCTT GCTGTCTTAC ACCTCCACAA  
 Dsim 32 ~~~TAAATAT AATAATTTGT ATTCAATT~G TTGGACTCTT GCTGTCTTAC ACCTCCACAA  
 Dsec 32 ~~~TAAATAT AATAATTTGT ATTCAATT~G TTGGACTCTT ACTGTCTTAC ACCTCCACAA  
 Dere 32 ~~~TAAATAT AATAATTTGT ATTCAATT~G TTGGACTCTT GCTGCCTTAC ACCTCCACAA  
 Dyak 32 ~~~TAAATAT AATAATTTGT ATTCAATT~G TTGGACTCTT GCTGTCTTAC ACCTCCACAA  
 Dana 32 ~~~TAAATAA ATGAATTTGT ATTCAATTG TTGTCTCTT GCTGACTTAC ACCTCTCAA  
 Dper 32 ~~~TAAATTC ATTAATTTGT ATTCAATT~C CTGGAGTCTT GCTGTCTTAC ACCTCTCAA  
 Dpse 32 ~~~TAAATTC ATTAATTTGT ATTCAATT~C CTGGAGTCTT GCTGTCTTAC ACCTCTCAA  
 Dwil 60 GATTTTGTGTC CATCATTGT ATTCCAT~G TATCGAAACG CCATTCAAAT TAGCCCATCA  
 Dmoj 33 ~~~TTACAAT TTTAATTTGT ATTCAATC~G ATTGCCT~TC GCTGTCTTAC ACCTAAATGT  
 Dvir 32 ~~~TTAAAGG TTTAATTTGT ATTCAATT~G CTTGCCTCTT GCTGTCTTAC ACCTAAATGC  
 Dgri 32 ~~~TTAAAGG TTTCAATTGT ATTCAATC~G ATTGCTTCTT GCTATCTTAC ACCTAAATGC

Dmel 88 AT~CGATT~ ~~~~~GGA CCGAACA~ ~~~~~TTTTT GGCTAATCGA  
 Dsim 88 AT~CGATT~ ~~~~~GGA CCGAACA~ ~~~~~TTTTT GGCTAATCGA  
 Dsec 88 AT~CGATT~ ~~~~~GGA CCGAACA~ ~~~~~TTTTT GGCTAATCGA  
 Dere 88 AT~CGATT~ ~~~~~GGA CTGA~CA~ ~~~~~ATTTT GGCTAATCGA  
 Dyak 88 AT~CGATT~ ~~~~~GAT~ ~~~~~TTTTTTT GGCTAATCGA  
 Dana 89 AT~TGATT~ ~TGAAT~ GAT~ ~~~~~TTTTTTT GGCTAATCGA  
 Dper 88 AT~CGAT~ ~CGATCGATC GATCGCTGGA TTTACTGAAC CCCTTTTCTT TGCTAATTAA  
 Dpse 88 AT~CGATCGA TCGATCGATC GATCGCTGGA TTTACTGAAC CCCTTTTCTT TGCTAATTAA  
 Dwil 118 TT~GATC ~~~~~T ATGCGTTGAT TCGTTGATTT GGCTAATTAA  
 Dmoj 88 GTTCGATA ~~~~~AAAT CCGTTGATTT GGCTGATTGA  
 Dvir 88 GTTCGA ~~~~~AAAT CCGTTGATTT GGCTGATTGA  
 Dgri 88 GTTCGA ~~~~~AAAT CGATTGATTT GGCTAATTGA

Dys GAA

|---|---|

Dmel 120 ATATTCATTG CATATAAC ~~~~~GCACGACT TGTTTA ~~~~~TGCTT~  
 Dsim 120 ATATTCATTG CATATAAC ~~~~~GCACGACT TGTTTA ~~~~~TGCTT~  
 Dsec 120 ATATTCATTG CA~ATAAC ~~~~~GCACGACT TGTTTA ~~~~~TGCTT~  
 Dere 119 ATATTCATTG CATATAAC ~~~~~GCACGACT TGTTTA ~~~~~TGCTT~  
 Dyak 106 ATATTCATTG CATATAAC ~~~~~GCACGACT TGTTTA ~~~~~TGCTT~  
 Dana 121 ATATTCATTG CATATAGC ~~~~~GCACGACT TGTTTA ~~~~~TGTTTTT  
 Dper 143 ATATTCATTG CAGATAAC ~~~~~GCACGACT TGTTTA ~~~~~TGCTT~  
 Dpse 147 ATATTCATTG CAGATAAC ~~~~~GCACGACT TGTTTA ~~~~~TGCTT~  
 Dwil 141 ATATTCCTTG CATATAGC ~ATAGCTC TTGCTCGTTT CTTCTGTTCA ATTGC~  
 Dmoj 127 ATATGCATTG CATATAGCAT CCGATGCGAT ATGCACGATT TGTTTA ~~~~~TGTTTC~  
 Dvir 118 ATATGCATTG CATATAGCGT C~GATCCCAT ATGCACGATT TGCTTA ~~~~~TGTTTC~  
 Dgri 118 ATATGCATTG CATATAGCGT C~G~TCC~AA ATGCACGATT TGTTTA ~~~~~TGTTAC~

Dmel 157 ~~~~~TGGTTGGTTA AATGGTAATT TCCCTAC~ ~~~~~AAGT  
 Dsim 157 ~~~~~CGTTGTTTA AATGGTAATT TCCCTAC~ ~~~~~AAGT  
 Dsec 156 ~~~~~CGTTGGTTT AATGGTAATT TCCCTAC~ ~~~~~AAGT  
 Dere 156 ~~~~~CGATTGGTTA AATGGTAATT TCCCTAC~ ~~~~~AAGT

|      |     |              |            |            |            |            |            |           |           |
|------|-----|--------------|------------|------------|------------|------------|------------|-----------|-----------|
| Dyak | 143 | ~ ~ ~ ~ ~    | CGATTGGTTA | AATGGTAATT | TCCCTAC    | ~ ~ ~ ~ ~  | ~ ~ ~ ~ ~  | ~ ~ ~ ~ ~ | AAAGT     |
| Dana | 160 | GGTT~TCTGG   | TTTTTGGTTA | AATGGTAATT | TTCCCTCC   | ~ ~ ~ ~ ~  | ~ ~ ~ ~ ~  | ~ ~ ~ ~ ~ | ATGT      |
| Dper | 175 | ~ ~ ~ ~ ~    | TGTTT      | AATGCTAATT | TCCTTGC    | ~ ~ ~ ~ ~  | ~ ~ ~ ~ ~  | ~ ~ ~ ~ ~ | ATGT      |
| Dpse | 179 | ~ ~ ~ ~ ~    | TGTTT      | AATGCTAATT | TCCTTGC    | ~ ~ ~ ~ ~  | ~ ~ ~ ~ ~  | ~ ~ ~ ~ ~ | ATGT      |
| Dwil | 191 | ~ ~ ~ ACGATT | TGGGTTTTTT | AATGCTAATT | TATTTATTTT | ATGAAAATCC | AATATTATAA | ~ ~ ~ ~ ~ | ~ ~ ~ ~ ~ |
| Dmoj | 178 | ~ ~ ~ ~ ~    | GATTCGTAA  | TATGCTAATT | TGCTGTCGTC | GCGA       | ~ ~ ~ ~ ~  | ~ ~ ~ ~ ~ | ~ ~ ~ ~ ~ |
| Dvir | 168 | ~ ~ ~ ~ ~    | CATTCGTAA  | TATGCTAATT | TTCTGT     | ~ ~ ~ ~ ~  | ~ ~ ~ ~ ~  | ~ ~ ~ ~ ~ | ~ ~ ~ ~ ~ |
| Dgri | 166 | ~ ~ ~ ~ ~    | CATTTGTAA  | AATGCTAATT | TGCAGT     | ~ ~ ~ ~ ~  | ~ ~ ~ ~ ~  | ~ ~ ~ ~ ~ | ~ ~ ~ ~ ~ |

|      |     |            |            |             |             |             |            |           |           |
|------|-----|------------|------------|-------------|-------------|-------------|------------|-----------|-----------|
| Dmel | 188 | TCCATA     | ~ ~ ~ ~ ~  | GC~TAAAATT  | CTTAGCCACC  | AGGT        | ~ ~ ~ ~ ~  | ~ ~ ~ ~ ~ | A         |
| Dsim | 188 | TCCATA     | ~ ~ ~ ~ ~  | GC~TAAAATT  | CTTAGCCACC  | AGGT        | ~ ~ ~ ~ ~  | ~ ~ ~ ~ ~ | A         |
| Dsec | 187 | TCCATA     | ~ ~ ~ ~ ~  | GC~TAAAATT  | CTTAGCCACC  | AGGT        | ~ ~ ~ ~ ~  | ~ ~ ~ ~ ~ | A         |
| Dere | 187 | TCCATA     | ~ ~ ~ ~ ~  | GC~TAAAATT  | CTTAGCCACC  | AGGT        | ~ ~ ~ ~ ~  | ~ ~ ~ ~ ~ | A         |
| Dyak | 174 | TCCATA     | ~ ~ ~ ~ ~  | GC~CAAAAATT | CTTAGCCACC  | AAGT        | ~ ~ ~ ~ ~  | ~ ~ ~ ~ ~ | A         |
| Dana | 200 | CCCATA     | ~ ~ ~ ~ ~  | GC~AGAAAATT | CTAAACCAGA  | AGCT        | ~ ~ ~ ~ ~  | ~ ~ ~ ~ ~ | A         |
| Dper | 201 | CCCATA     | ~ ~ ~ ~ ~  | GC~TGAAAATT | CTAAGCCAAC  | AAAA        | ~ ~ ~ ~ ~  | ~ ~ ~ ~ ~ | ~ ~ ~ ~ ~ |
| Dpse | 205 | CCCATA     | ~ ~ ~ ~ ~  | GC~TGAAAATT | CTAAGCCAAC  | AAAA        | ~ ~ ~ ~ ~  | ~ ~ ~ ~ ~ | ~ ~ ~ ~ ~ |
| Dwil | 247 | CCCATAAAAA | TTGTCGTCTA | GC~TGAAAATT | CTAAAAAACC  | AAAT~AAATA  | AA~        | ~ ~ ~ ~ ~ | ~ ~ ~ ~ ~ |
| Dmoj | 211 | ~ ~ ~ ~ ~  | CGGGCATT   | TCATGAAAAGT | CCAA~CATTAA | CCAT~TAAATT | GACCGATAGC | ~ ~ ~ ~ ~ | ~ ~ ~ ~ ~ |
| Dvir | 193 | ~ ~ ~ ~ ~  | CGGGCAGC   | TCATGAAAAGT | CCAA~CATTTA | CCAT~TAAACT | GACTGATAGC | ~ ~ ~ ~ ~ | ~ ~ ~ ~ ~ |
| Dgri | 191 | ~ ~ ~ ~ ~  | CGGGCATT   | TCATGAAAAGT | CCAA~CATTAA | CCAT~TAAACT | GACTGATAGC | ~ ~ ~ ~ ~ | ~ ~ ~ ~ ~ |

Dys

|      |     |            |              |            |            |            |           |            |           |
|------|-----|------------|--------------|------------|------------|------------|-----------|------------|-----------|
| Dmel | 218 | TGAAAAGCA  | ~ ~ ~ ~ ~    | ~ ~ ~ ~ ~  | AA         | AAAGAAAGAC | AC~GAGTCC | TGTAACCAAG | ~ ~ ~ ~ ~ |
| Dsim | 218 | AGAAAAGCA  | ~ ~ ~ ~ ~    | ~ ~ ~ ~ ~  | AA         | AAAGAAAGAC | AC~GAGTCC | TGTAACCAAG | ~ ~ ~ ~ ~ |
| Dsec | 217 | AGAAAAGCA  | ~ ~ ~ ~ ~    | ~ ~ ~ ~ ~  | AA         | AAAGAAATAC | AC~GAGTCC | TGTAACCAAG | ~ ~ ~ ~ ~ |
| Dere | 217 | AGAAAAGCA  | ~ ~ ~ ~ ~    | ~ ~ ~ ~ ~  | AA         | AAAGAAAGAC | AC~GAGTCC | TGTTCCCAAG | ~ ~ ~ ~ ~ |
| Dyak | 204 | AGAAAAGCA  | ~ ~ ~ ~ ~    | ~ ~ ~ ~ ~  | GA         | GAAGAAAGAC | AC~GAGTCC | TGTTCCCAAG | ~ ~ ~ ~ ~ |
| Dana | 230 | AGAAAGTCAG | GCACCAATAG   | CATAAAAAAA | GAAGAAAGAC | AC~GAGTCC  | TGTTTTCAG | ~ ~ ~ ~ ~  | ~ ~ ~ ~ ~ |
| Dper | 230 | ~ ~ ~ ~ ~  | GGGTCAAAAA   | TA~        | CAA        | AATGAAAGAC | AC~GAGTCC | TGTCCTCGAG | ~ ~ ~ ~ ~ |
| Dpse | 234 | ~ ~ ~ ~ ~  | GGGTCAAAAA   | TA~        | CAA        | AATGAAAGAC | AC~GAGTCC | TGTCCTCGAG | ~ ~ ~ ~ ~ |
| Dwil | 297 | ~ ~ ~ ~ ~  | A TACCCAAAAA | AA~        | AAA        | AGAGAAAGAC | ACCGAGTCC | TGTTTTTAAG | ~ ~ ~ ~ ~ |
| Dmoj | 259 | TGAAATTCT  | ~ ~ ~ ~ ~    | ~ ~ ~ ~ ~  | ~ ~ ~ ~ ~  | ~ ~ ~ ~ ~  | ~ ~ ~ ~ ~ | ~ ~ ~ ~ ~  | ~ ~ ~ ~ ~ |
| Dvir | 241 | TGAAATTCTA | AGCC         | ~ ~ ~ ~ ~  | ATCA       | AATGAAAGAC | AC~GAGTCC | TGTTTTCGAG | ~ ~ ~ ~ ~ |
| Dgri | 239 | TGAAATTCTA | AGTC         | ~ ~ ~ ~ ~  | ATCA       | AATGAAAGAC | AC~GAGTCC | TGTTTTCGAG | ~ ~ ~ ~ ~ |

|      |     |            |            |            |   |             |            |           |        |            |
|------|-----|------------|------------|------------|---|-------------|------------|-----------|--------|------------|
| Dmel | 257 | TCATTGACAG | CAATTT     | ~ ~ ~ ~ ~  | G | ATGTT~AAGT  | A~         | ~ ~ ~ ~ ~ | C      | GT~CTG     |
| Dsim | 257 | TCATTGACAG | CAATTT     | ~ ~ ~ ~ ~  | G | ATGTT~AAGT  | A~         | ~ ~ ~ ~ ~ | C      | GT~CTG     |
| Dsec | 256 | TCATTGACAG | CAATTT     | ~ ~ ~ ~ ~  | G | ATGTT~AAGT  | A~         | ~ ~ ~ ~ ~ | C      | GT~CTG     |
| Dere | 256 | TCATTGACAG | CAATTT     | ~ ~ ~ ~ ~  | G | ATGTT~AAGT  | A~         | ~ ~ ~ ~ ~ | C      | GT~CTG     |
| Dyak | 243 | TCATTGACAG | CAATTT     | ~ ~ ~ ~ ~  | G | ATGTT~AAGT  | A~         | ~ ~ ~ ~ ~ | T      | GT~CTG     |
| Dana | 288 | TCATTGACAG | CGATTT     | ~ ~ ~ ~ ~  | G | ATGGC~AAGA  | A~         | ~ ~ ~ ~ ~ | T      | GT~CTG     |
| Dper | 273 | TCATTGACAG | CAATTT     | ~ ~ ~ ~ ~  | G | ATGTT~CGGTC | TGGT       | ~ ~ ~ ~ ~ | CT     | GT~CTG     |
| Dpse | 277 | TCATTGACAG | CAATTT     | ~ ~ ~ ~ ~  | G | ATGTT~CGGTC | TGGT       | ~ ~ ~ ~ ~ | CT     | GT~CTG     |
| Dwil | 343 | TCATTGACAT | TGTTTTCTTT | AGTTATTTTC | G | ATATT~TTTC  | TGGGACTACT | GTTTT     | CAGGAA | ~ ~ ~ ~ ~  |
| Dmoj | 291 | TCATTGACTG | CGGTTT     | ~ ~ ~ ~ ~  | T | ATGTT~ACT   | TTGAA      | ~ ~ ~ ~ ~ | T      | GCG~CTCAAT |
| Dvir | 287 | TCATTGACTG | CGGTTT     | ~ ~ ~ ~ ~  | T | ATGTT~TCT   | TAGAA      | ~ ~ ~ ~ ~ | T      | GTG~CTGGAT |
| Dgri | 285 | TCATTGACTG | GACTTT     | ~ ~ ~ ~ ~  | T | ATGTT~TCT   | TAAAA      | ~ ~ ~ ~ ~ | T      | GTG~C~GGAT |

AAG Dys

|      |     |            |               |            |            |             |             |           |           |           |
|------|-----|------------|---------------|------------|------------|-------------|-------------|-----------|-----------|-----------|
| Dmel | 290 | ~ ~ ~ ~ ~  | CCAATGATTT    | CGAA~AGTC  | GTGATT     | ~ ~ ~ ~ ~   | ~ ~ ~ ~ ~   | ~ ~ ~ ~ ~ | ~ ~ ~ ~ ~ | TAT       |
| Dsim | 290 | ~ ~ ~ ~ ~  | CCAATGATTT    | CGAA~AGTC  | GTGATT     | ~ ~ ~ ~ ~   | ~ ~ ~ ~ ~   | ~ ~ ~ ~ ~ | ~ ~ ~ ~ ~ | TAT       |
| Dsec | 289 | ~ ~ ~ ~ ~  | CCAATGATTT    | CGAA~AGTC  | GTGATT     | ~ ~ ~ ~ ~   | ~ ~ ~ ~ ~   | ~ ~ ~ ~ ~ | ~ ~ ~ ~ ~ | TAT       |
| Dere | 289 | ~ ~ ~ ~ ~  | CCAATGATTT    | CGAA~AGTC  | GTGATT     | ~ ~ ~ ~ ~   | ~ ~ ~ ~ ~   | ~ ~ ~ ~ ~ | ~ ~ ~ ~ ~ | TAT       |
| Dyak | 276 | ~ ~ ~ ~ ~  | CCAATGATTT    | CGAA~AGTC  | GTGATT     | ~ ~ ~ ~ ~   | ~ ~ ~ ~ ~   | ~ ~ ~ ~ ~ | ~ ~ ~ ~ ~ | TAT       |
| Dana | 321 | ~ ~ ~ ~ ~  | GCCCCAAGCTG   | CGAA~AGTC  | GTGATT     | ~ ~ ~ ~ ~   | ~ ~ ~ ~ ~   | ~ ~ ~ ~ ~ | ~ ~ ~ ~ ~ | TAT       |
| Dper | 311 | ~ ~ ~ ~ ~  | CTACTGGATG    | AGAA~AGTC  | GTGATT     | ~ ~ ~ ~ ~   | ~ ~ ~ ~ ~   | ~ ~ ~ ~ ~ | ~ ~ ~ ~ ~ | TAT       |
| Dpse | 315 | ~ ~ ~ ~ ~  | CTACTGGATG    | AGAA~AGTC  | GTGATT     | ~ ~ ~ ~ ~   | ~ ~ ~ ~ ~   | ~ ~ ~ ~ ~ | ~ ~ ~ ~ ~ | TAT       |
| Dwil | 402 | CGTAGTAACA | AAACAAATTT    | GGGAGCAGTC | GTGATCAGTA | ATTGTTTTTTT | TTCTTTTTTAT | ~ ~ ~ ~ ~ | ~ ~ ~ ~ ~ | ~ ~ ~ ~ ~ |
| Dmoj | 331 | AGTCGTA    | ~ ~ ~ TATAGAG | TGGA~TGTC  | GTGCCTCCTC | CAATGGG     | ~ ~ ~ ~ ~   | ~ ~ ~ ~ ~ | ~ ~ ~ ~ ~ | ~ ~ ~ ~ ~ |

Dvir 327 ~~~GTA~~~ ~~~TGTACAG CTGA~TGTC GTGCCTCCTC CAATGGG~  
 Dgri 324 C~ ~~~ ~~~GA~TGTC GTGCCTCCTC CAATGGG~

V345 <--|

Dmel 317 TCGACTAT~ ~~~~TTA GGCCAGAC~ ~~~~ATTT~ CAAGAAAAACA TAAGCAAAGT  
 Dsim 317 TCGACTAT~ ~~~~TTA GGCCAGAC~ ~~~~ATTT~ CAAGAAAAACA TTAGCAAAGA  
 Dsec 316 TCGACTAT~ ~~~~TTA GGCCAGAC~ ~~~~ATTT~ CAAGAAAAACA TAAGCAAAGT  
 Dere 316 TTGACTAT~ ~~~~TTA GGCCAGAC~ ~~~~ATTT~ CAAGAAAAACA CAAACAAAGT  
 Dyak 303 TCGACTAT~ ~~~~TTA GGCCAGAC~ ~~~~ATTT~ CAAGAAAAACA CAAAAAAAGT  
 Dana 348 TTGACTAT~ ~~~~TTA GGACAGAGCA GTAAATTTTT CTGGAAATC GAAAGGAATT  
 Dper 338 TGGACTAT~ ~~~~TCA GGCCAGGCCA ATAAATTTCC CAAAAATACT TAAATAAATG  
 Dpse 342 TGGACTAT~ ~~~~TCA GGCCAGGCCA ATAAATTTCC CAAAAATACT TAAATAAATG  
 Dwil 462 ACGATTTGGT TTATGGCTTA GGTGTCTAGT A~ ~ATTTGC ATTATATAAA AGACAGCTAA  
 Dmoj 370 ~~~~ ~~~~TCA GATTCA~ ~~~~TAAATTATG AGACAAAAGT TTGACGAATT  
 Dvir 362 ~~~~ ~~~~TCA GAGCTA~ ~~~~TAAATTATT GGGCAAAAGC TTCAACTAGT  
 Dgri 348 ~~~~ ~~~~TCA GGCCTA~ ~~~~TAAATTATG CAGCAATTCA CTTAAATATT

Dmel 360 AAC~AAAATA AATTG~TTTT CAAACTGTTT GTAACTGAAT TATTCATTGC A~ATGTTCTG  
 Dsim 360 AAC~AAATTA AATTT~ ~~~~ ~AAACTGTTT GTAACTGAAT TATTCATTGC A~ATGTTCTA  
 Dsec 359 AAC~AAATTA AATTT~ ~~~~ ~AAGCTGTTT GTAACTGAAT TATTCATTGC ATATGTTCTC  
 Dere 359 AAC~AAATTA AATGA~TTTT AAAACTTTT GTAATTTGAAT TATTCATTGC A~ATGTTCTG  
 Dyak 346 ACC~AAATTA AATTG~TTTT AAAACTCTT GTAATTTGAAT TATTCATTGC A~ATATCTG  
 Dana 399 TTAATTATCA GAGGTTAAGG AGATACTAAA TATGCCGTCT AAAGCAATTT TTCCAAATAT  
 Dper 389 CAAATAAAAA ACAACAAAAA TACAAATACA AGCAACAAAT TTTTGTAATA TCTTTGGATA  
 Dpse 393 CAAATAAAAA ACAAAAAAAA TACAAATACC AGCAACAAAT TT~TGTAATT TCTTTCGACA  
 Dwil 519 CAAATTGATT GAATATTATA TGTAGGTACT ACCTATAACT GACCTCATT TTTAGTGAAT  
 Dmoj 408 TTGTTTTGTT TTTTTTATTT TTTTTATCAT TAATGATGAA ATATAAAAAA CAA~CAACA  
 Dvir 400 TCACCAAGTT ATTTAATGGC CTCATAATA AAATTGCGAT ATTTTAAAT TATAATAAAA  
 Dgri 386 CATTGGAGCC AATACATACA TTTTTATGTT TCCTAAAAC ATATAACGAT TTTAAATTA

Dmel 417 AACGAGTAAC CC~TTTCTTT AATCTACATA GTTCTTCAAC CAAA~TAT~ ACTATACTA~  
 Dsim 412 AACGAGAAAC CC~TTTCTTA AATCTACGTA GTACTTCAAC CAAA~TAT~ AT~AAATTA~  
 Dsec 412 AATGAGAAAC CC~TTTCTTC AATCTACATA GTTCTTCAAC CAAA~TAT~ AC~AAATTA~  
 Dere 416 GACGAGAAAC TA~CCT~ ~~~~ AAT~AGATA ATAGTATA~ CGAG~TAT~ ~~~~ATAG~  
 Dyak 403 GAAGAGGGAC CACATTTAGC AATCTACATA GTTTGTCAAC CAAAGTGTG AT~AATTTTT  
 Dana 459 TTTAGTCAGC TTATTGTAGG CTTCGCCTTT TTAATTTTTT TGGCCTAAAC TTAAATTA  
 Dper 449 ATCATTAAAG GTGATTTATT AATCAGAAAC ACTCTTCAAT CATGAAACAA TTATTATTAA  
 Dpse 452 ATCATTAAAG GTGATTTATT AATCAGAAAT ACTCTTCAAT CATGAAACAA TTATTATTAA  
 Dwil 579 AAAAACTCTA AATAATTTGAA TTGAATCTAT CAGGAGTTTT TTAGTAGCAA ATCGACCGAA  
 Dmoj 466 AAAAAATAAA AAAAAAATAT ATATATATAT ATATGTATAT AAAAAATAAT TAATATAAAA  
 Dvir 460 TATATTATAG ACGAATTGTC TGAAATGAAA CGGTAATAGT AAGCCTATTT TAATTAAATT  
 Dgri 446 ATACAGAAAA TATAAATCGA GATACATTTT TAACGTAAAA TATTAATAAGA GCTCAAATGT

Dys

-----

Dmel 472 ~~~TACTAAT AGCAGGAGAA TCATATAAAT A~TCTTTCA CC~ ~~~~  
 Dsim 466 ~~~TA~TTAT AGCAAGAGAA TCATATCAAT A~ ~TCTTTCA CC~ ~~~~  
 Dsec 466 ~~~TA~TTAT AGCAAGAGAA TCATATCAAT A~ ~TCTTTCA CC~ ~~~~  
 Dere 458 ~~~AAACTAAT AGCAAGATAA ACTTATCAAT A~TCTTTCA CC~ ~~~~  
 Dyak 462 AAAAACTAAT AGCAAGAAAT ACATATCAAT A~TCTATCA CC~ ~~~~  
 Dana 519 TAGGTTAAAC TGATGCAATT ATAAAAATATA GTAAAGAAAT GTATGAAGTA ATCAAGAAGC  
 Dper 509 TTATCTACAT ATATGTACAA TAAAAATCAC TTCACACTGT CGTCCTTTTA TAAAGGTATT  
 Dpse 512 TTATCTACAT ATACGTACAA TAAAAATCAC TTCACACTGT CGTCCTTTTA TAAAGGCATT  
 Dwil 639 TAAAACCTCA TAATGAAAGCT AAGTTTAAAA TTGTTTGAAC TCGATAAAGC AGGATTTAAA  
 Dmoj 526 TATGTAATAA AAAAAATTATT ATCTATTTAA TATACATATA ATAATAATA TA~ATTAATA  
 Dvir 520 GTGAAAATAG TATGCTTTTA TTGTAATTTT AGAAAAGAGA AQAATTTAAT GAAGGCCCTG  
 Dgri 506 ATTTAAATTA ATGTATGAAT CTGAAACAAA TACATTATAC ATTATACTAA TAGTCCGCAC

Dmel 509 ~~~~ ~~~~ ~~~~ ~~~~ ~~~~ ~~~~  
 Dsim 495 ~~~~ ~~~~ ~~~~ ~~~~ ~~~~ ~~~~  
 Dsec 495 ~~~~ ~~~~ ~~~~ ~~~~ ~~~~ ~~~~  
 Dere 496 ~~~~ ~~~~ ~~~~ ~~~~ ~~~~ ~~~~
