# Supplementary material
Source: PubMed Central journal article supplement (PMC2872039)

Supplementary Fig. 7

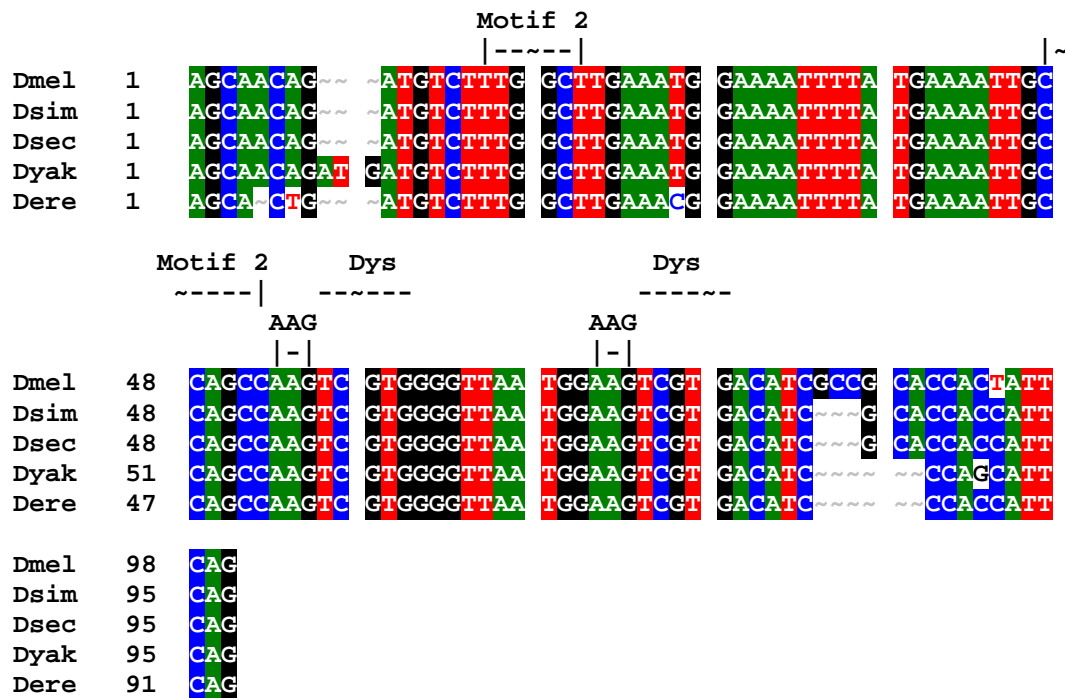

Supplement: NIHMS193291-supplement-8.pdf [file NIHMS193291-supplement-8.pdf]
